# Supplementary material for: Whole Transcriptome Sequencing and ceRNA Regulatory Network in Diabetic Peripheral Neuropathy
Source: Research Square preprint supplement (doi:10.21203/rs.3.rs-5673628/v1), 2025-01-09
Supplement: Supplementary file 1 [file 548c326d6c8c1c38736c734c.xlsx]

## Sheet: Sheet1
Category	ID	Term	Count	%	PValue	Genes	List Total	Pop Hits	Pop Total	Fold Enrichment	Bonferroni	Benjamini	FDR
BP	GO:0045214	sarcomere organization	4	21.0526	8.3156e-06	ACTN2, LDB3, MYOM2, MYH7	19	43	19219	94.0955	0.00424855	0.00394587	0.00359136
BP	GO:0006936	muscle contraction	4	21.0526	1.85366e-05	ACTN2, TNNI2, MYOM2, MYH7	19	56	19219	72.2519	0.00944592	0.00394587	0.00359136
BP	GO:1990646	cellular response to prolactin	3	15.7895	2.31203e-05	IL6, JUN, FOS	19	8	19219	379.322	0.0117679	0.00394587	0.00359136
BP	GO:0042102	positive regulation of T cell proliferation	4	21.0526	4.8318e-05	IL6, PTPRC, CD40LG, CD3E	19	77	19219	52.5468	0.0244359	0.0061847	0.00562905
BP	GO:0030183	B cell differentiation	4	21.0526	6.49359e-05	CD79B, CR2, PTPRC, CD40LG	19	85	19219	47.6012	0.0327016	0.00664943	0.00605202
BP	GO:0034097	response to cytokine	4	21.0526	0.00011505	IL6, JUN, SELL, FOS	19	103	19219	39.2826	0.0572076	0.00981764	0.00893558
BP	GO:0009612	response to mechanical stimulus	4	21.0526	0.000167846	IL6, JUN, FOS, TNF	19	117	19219	34.5821	0.0823545	0.0122767	0.0111737
BP	GO:0003009	skeletal muscle contraction	3	15.7895	0.000429977	TNNI2, TNF, MYH7	19	33	19219	91.9569	0.197638	0.0275185	0.0250461
BP	GO:0045893	positive regulation of transcription, DNA-templated	6	31.5789	0.000509936	IL6, JUN, ACTN2, TNNI2, FOS, TNF	19	753	19219	8.05997	0.229838	0.0290097	0.0264034
BP	GO:0042100	B cell proliferation	3	15.7895	0.00106851	CR2, PTPRC, CD40LG	19	52	19219	58.3573	0.421531	0.0487663	0.0443849
BP	GO:1902895	positive regulation of pri-miRNA transcription from RNA polymerase II promoter	3	15.7895	0.0011098	JUN, FOS, TNF	19	53	19219	57.2562	0.433644	0.0487663	0.0443849
BP	GO:0045471	response to ethanol	4	21.0526	0.00119363	JUN, CD27, FOS, TNF	19	229	19219	17.6686	0.457466	0.0487663	0.0443849
BP	GO:0097191	extrinsic apoptotic signaling pathway	3	15.7895	0.00123821	PTPRC, CD27, TNF	19	56	19219	54.1889	0.469722	0.0487663	0.0443849
BP	GO:0043066	negative regulation of apoptotic process	5	26.3158	0.00211772	IL6, JUN, CD40LG, CD27, TNF	19	607	19219	8.33218	0.66224	0.07308	0.0665142
BP	GO:0032496	response to lipopolysaccharide	4	21.0526	0.00216623	IL6, JUN, FOS, TNF	19	282	19219	14.3479	0.670544	0.07308	0.0665142
BP	GO:0050853	B cell receptor signaling pathway	3	15.7895	0.00238525	CD79B, PTPRC, CD19	19	78	19219	38.9049	0.705567	0.07308	0.0665142
BP	GO:0071222	cellular response to lipopolysaccharide	4	21.0526	0.00246218	IL6, JUN, CR2, TNF	19	295	19219	13.7156	0.716967	0.07308	0.0665142
BP	GO:0043154	negative regulation of cysteine-type endopeptidase activity involved in apoptotic process	3	15.7895	0.00256922	IL6, CD27, TNF	19	81	19219	37.4639	0.732098	0.07308	0.0665142
BP	GO:0032729	positive regulation of interferon-gamma production	3	15.7895	0.00282464	CD40LG, CD3E, TNF	19	85	19219	35.7009	0.765021	0.0761165	0.0692779
BP	GO:0048661	positive regulation of smooth muscle cell proliferation	3	15.7895	0.00309154	IL6, JUN, TNF	19	89	19219	34.0964	0.795118	0.0769087	0.0699989
BP	GO:0014070	response to organic cyclic compound	4	21.0526	0.00315446	IL6, JUN, FOS, TNF	19	322	19219	12.5655	0.801633	0.0769087	0.0699989
BP	GO:0007568	aging	4	21.0526	0.00398807	IL6, JUN, FOS, MYH7	19	350	19219	11.5603	0.870746	0.0916506	0.0834164
BP	GO:0006954	inflammatory response	4	21.0526	0.00411712	IL6, CR2, CD40LG, TNF	19	354	19219	11.4297	0.879043	0.0916506	0.0834164
BP	GO:0014823	response to activity	3	15.7895	0.00501506	IL6, FOS, TNF	19	114	19219	26.6191	0.923783	0.106988	0.0973757
BP	GO:0050731	positive regulation of peptidyl-tyrosine phosphorylation	3	15.7895	0.00554089	IL6, PTPRC, CD3E	19	120	19219	25.2882	0.941855	0.110415	0.100495
BP	GO:2000866	positive regulation of estradiol secretion	2	10.5263	0.00560703	IL6, TNF	19	6	19219	337.175	0.943802	0.110415	0.100495
BP	GO:0051091	positive regulation of sequence-specific DNA binding transcription factor activity	3	15.7895	0.00627976	IL6, JUN, TNF	19	128	19219	23.7076	0.960259	0.111593	0.101567
BP	GO:0002925	positive regulation of humoral immune response mediated by circulating immunoglobulin	2	10.5263	0.00653864	PTPRC, TNF	19	7	19219	289.008	0.965222	0.111593	0.101567
BP	GO:0060664	epithelial cell proliferation involved in salivary gland morphogenesis	2	10.5263	0.00653864	IL6, TNF	19	7	19219	289.008	0.965222	0.111593	0.101567
BP	GO:0010573	vascular endothelial growth factor production	2	10.5263	0.00653864	IL6, TNF	19	7	19219	289.008	0.965222	0.111593	0.101567
BP	GO:0032868	response to insulin	3	15.7895	0.00706124	IL6, JUN, FOS	19	136	19219	22.3131	0.973436	0.116624	0.106146
BP	GO:0002637	regulation of immunoglobulin production	2	10.5263	0.00839939	CD40LG, TNF	19	9	19219	224.784	0.986682	0.13439	0.122316
BP	GO:0046641	positive regulation of alpha-beta T cell proliferation	2	10.5263	0.0102569	PTPRC, CD3E	19	11	19219	183.914	0.994901	0.159137	0.144839
BP	GO:0031953	negative regulation of protein autophosphorylation	2	10.5263	0.0111843	JUN, PTPRC	19	12	19219	168.588	0.996845	0.168423	0.153291
BP	GO:0045059	positive thymic T cell selection	2	10.5263	0.012111	PTPRC, CD3E	19	13	19219	155.619	0.998048	0.171151	0.155774
BP	GO:0061061	muscle structure development	2	10.5263	0.012111	PDLIM3, LDB3	19	13	19219	155.619	0.998048	0.171151	0.155774
BP	GO:0030036	actin cytoskeleton organization	3	15.7895	0.0130055	PDLIM3, ACTN2, LDB3	19	187	19219	16.2277	0.998772	0.171151	0.155774
BP	GO:0009410	response to xenobiotic stimulus	4	21.0526	0.0130134	IL6, JUN, FOS, TNF	19	538	19219	7.52064	0.998777	0.171151	0.155774
BP	GO:0045060	negative thymic T cell selection	2	10.5263	0.0130369	PTPRC, CD3E	19	14	19219	144.504	0.998792	0.171151	0.155774
BP	GO:0071356	cellular response to tumor necrosis factor	3	15.7895	0.0134051	IL6, CD40LG, FOS	19	190	19219	15.9715	0.999002	0.171585	0.156169
BP	GO:1904996	positive regulation of leukocyte adhesion to vascular endothelial cell	2	10.5263	0.0139619	IL6, TNF	19	15	19219	134.87	0.999253	0.174354	0.158689
BP	GO:0043410	positive regulation of MAPK cascade	3	15.7895	0.015198	IL6, PTPRC, TNF	19	203	19219	14.9487	0.999607	0.185271	0.168625
BP	GO:0034224	cellular response to zinc ion starvation	2	10.5263	0.0158095	JUN, FOS	19	17	19219	119.003	0.999714	0.186865	0.170076
BP	GO:0042127	regulation of cell proliferation	3	15.7895	0.0160587	IL6, JUN, TNF	19	209	19219	14.5195	0.999749	0.186865	0.170076
BP	GO:0009617	response to bacterium	3	15.7895	0.0181471	CD79B, IL6, TNF	19	223	19219	13.608	0.999915	0.206473	0.187923
BP	GO:0010628	positive regulation of gene expression	4	21.0526	0.0185949	IL6, CD40LG, CD3E, TNF	19	615	19219	6.57903	0.999933	0.206969	0.188374
BP	GO:0050901	leukocyte tethering or rolling	2	10.5263	0.019495	SELL, TNF	19	21	19219	96.3358	0.999958	0.212371	0.193291
BP	GO:0031668	cellular response to extracellular stimulus	2	10.5263	0.0204143	PTPRC, FOS	19	22	19219	91.9569	0.999974	0.217752	0.198189
BP	GO:0070374	positive regulation of ERK1 and ERK2 cascade	3	15.7895	0.0216491	IL6, JUN, PTPRC	19	245	19219	12.386	0.999986	0.226211	0.205887
BP	GO:0035994	response to muscle stretch	2	10.5263	0.0222505	JUN, FOS	19	24	19219	84.2939	0.99999	0.227845	0.207375
BP	GO:0002526	acute inflammatory response	2	10.5263	0.0240834	IL6, TNF	19	26	19219	77.8097	0.999996	0.241779	0.220056
BP	GO:0045582	positive regulation of T cell differentiation	2	10.5263	0.0259131	PTPRC, CD27	19	28	19219	72.2519	0.999999	0.244132	0.222198
BP	GO:0032753	positive regulation of interleukin-4 production	2	10.5263	0.0259131	CD40LG, CD3E	19	28	19219	72.2519	0.999999	0.244132	0.222198
BP	GO:0001774	microglial cell activation	2	10.5263	0.0268268	JUN, TNF	19	29	19219	69.7604	0.999999	0.244132	0.222198
BP	GO:2000353	positive regulation of endothelial cell apoptotic process	2	10.5263	0.0277396	CD40LG, TNF	19	30	19219	67.4351	0.999999	0.244132	0.222198
BP	GO:0060252	positive regulation of glial cell proliferation	2	10.5263	0.0277396	IL6, TNF	19	30	19219	67.4351	0.999999	0.244132	0.222198
BP	GO:1900017	positive regulation of cytokine production involved in inflammatory response	2	10.5263	0.0286516	IL6, TNF	19	31	19219	65.2598	1	0.244132	0.222198
BP	GO:0016064	immunoglobulin mediated immune response	2	10.5263	0.0286516	CR2, CD19	19	31	19219	65.2598	1	0.244132	0.222198
BP	GO:0045672	positive regulation of osteoclast differentiation	2	10.5263	0.0286516	FOS, TNF	19	31	19219	65.2598	1	0.244132	0.222198
BP	GO:0050900	leukocyte migration	2	10.5263	0.0295628	SELL, TNF	19	32	19219	63.2204	1	0.244132	0.222198
BP	GO:0042113	B cell activation	2	10.5263	0.0295628	CR2, CD22	19	32	19219	63.2204	1	0.244132	0.222198
BP	GO:2001238	positive regulation of extrinsic apoptotic signaling pathway	2	10.5263	0.0295628	PTPRC, TNF	19	32	19219	63.2204	1	0.244132	0.222198
BP	GO:0002639	positive regulation of immunoglobulin production	2	10.5263	0.0313828	IL6, PTPRC	19	34	19219	59.5015	1	0.255048	0.232133
BP	GO:0032743	positive regulation of interleukin-2 production	2	10.5263	0.0359187	PTPRC, CD3E	19	39	19219	51.8731	1	0.28735	0.261533
BP	GO:0045740	positive regulation of DNA replication	2	10.5263	0.0368235	IL6, JUN	19	40	19219	50.5763	1	0.290056	0.263996
BP	GO:0071276	cellular response to cadmium ion	2	10.5263	0.0377274	JUN, FOS	19	41	19219	49.3427	1	0.292674	0.266379
BP	GO:0050796	regulation of insulin secretion	2	10.5263	0.0386306	IL6, TNF	19	42	19219	48.1679	1	0.295207	0.268685
BP	GO:0034614	cellular response to reactive oxygen species	2	10.5263	0.0404345	JUN, FOS	19	44	19219	45.9785	1	0.304448	0.277096
BP	GO:0032733	positive regulation of interleukin-10 production	2	10.5263	0.0413353	IL6, CD40LG	19	45	19219	44.9567	1	0.30672	0.279163
BP	GO:0030890	positive regulation of B cell proliferation	2	10.5263	0.0449304	PTPRC, CD40LG	19	49	19219	41.2868	1	0.328634	0.299108
BP	GO:0060048	cardiac muscle contraction	2	10.5263	0.0458272	TNNI2, MYH7	19	50	19219	40.4611	1	0.330472	0.300781
BP	GO:0032722	positive regulation of chemokine production	2	10.5263	0.0467232	IL6, TNF	19	51	19219	39.6677	1	0.332254	0.302403
BP	GO:0042110	T cell activation	2	10.5263	0.0476183	IL6, CD3E	19	52	19219	38.9049	1	0.333981	0.303975
BP	GO:0009314	response to radiation	2	10.5263	0.0494063	JUN, TNF	19	54	19219	37.4639	1	0.341838	0.311126
BP	GO:0045429	positive regulation of nitric oxide biosynthetic process	2	10.5263	0.0502991	IL6, TNF	19	55	19219	36.7828	1	0.343375	0.312525
BP	GO:1904707	positive regulation of vascular smooth muscle cell proliferation	2	10.5263	0.0529728	JUN, TNF	19	58	19219	34.8802	1	0.349083	0.31772
BP	GO:0030316	osteoclast differentiation	2	10.5263	0.0529728	FOS, TNF	19	58	19219	34.8802	1	0.349083	0.31772
BP	GO:0043065	positive regulation of apoptotic process	3	15.7895	0.0537929	IL6, JUN, TNF	19	403	19219	7.52997	1	0.349083	0.31772
BP	GO:0009409	response to cold	2	10.5263	0.0538625	IL6, FOS	19	59	19219	34.289	1	0.349083	0.31772
BP	GO:0048545	response to steroid hormone	2	10.5263	0.0547513	JUN, FOS	19	60	19219	33.7175	1	0.350408	0.318926
BP	GO:0046427	positive regulation of JAK-STAT cascade	2	10.5263	0.0565267	IL6, TNF	19	62	19219	32.6299	1	0.355345	0.32342
BP	GO:0042531	positive regulation of tyrosine phosphorylation of STAT protein	2	10.5263	0.0574132	IL6, TNF	19	63	19219	32.1119	1	0.355345	0.32342
BP	GO:0032731	positive regulation of interleukin-1 beta production	2	10.5263	0.0582989	IL6, TNF	19	64	19219	31.6102	1	0.355345	0.32342
BP	GO:0042098	T cell proliferation	2	10.5263	0.0582989	PTPRC, CD3E	19	64	19219	31.6102	1	0.355345	0.32342
BP	GO:0032757	positive regulation of interleukin-8 production	2	10.5263	0.0600679	IL6, TNF	19	66	19219	30.6523	1	0.357614	0.325484
BP	GO:0097190	apoptotic signaling pathway	2	10.5263	0.0600679	CD3E, TNF	19	66	19219	30.6523	1	0.357614	0.325484
BP	GO:0008285	negative regulation of cell proliferation	3	15.7895	0.0676966	IL6, JUN, TNF	19	459	19219	6.61128	1	0.396753	0.361107
BP	GO:0006469	negative regulation of protein kinase activity	2	10.5263	0.0688662	IL6, PTPRC	19	76	19219	26.6191	1	0.396753	0.361107
BP	GO:0097421	liver regeneration	2	10.5263	0.0697417	IL6, TNF	19	77	19219	26.2734	1	0.396753	0.361107
BP	GO:0060395	SMAD protein signal transduction	2	10.5263	0.0697417	JUN, FOS	19	77	19219	26.2734	1	0.396753	0.361107
BP	GO:0051591	response to cAMP	2	10.5263	0.0706165	JUN, FOS	19	78	19219	25.9366	1	0.397315	0.361619
BP	GO:0043406	positive regulation of MAP kinase activity	2	10.5263	0.0749787	PTPRC, TNF	19	83	19219	24.3741	1	0.417273	0.379783
BP	GO:0043525	positive regulation of neuron apoptotic process	2	10.5263	0.0793215	JUN, TNF	19	88	19219	22.9892	1	0.436695	0.39746
BP	GO:0007179	transforming growth factor beta receptor signaling pathway	2	10.5263	0.083645	JUN, FOS	19	93	19219	21.7533	1	0.455451	0.414531
BP	GO:0071277	cellular response to calcium ion	2	10.5263	0.0845074	JUN, FOS	19	94	19219	21.5218	1	0.455451	0.414531
BP	GO:0033138	positive regulation of peptidyl-serine phosphorylation	2	10.5263	0.0862299	IL6, TNF	19	96	19219	21.0735	1	0.459692	0.418391
BP	GO:0050852	T cell receptor signaling pathway	2	10.5263	0.0870901	PTPRC, CD3E	19	97	19219	20.8562	1	0.459692	0.418391
BP	GO:0046330	positive regulation of JNK cascade	2	10.5263	0.0905228	CD27, TNF	19	101	19219	20.0302	1	0.472936	0.430445
BP	GO:0019722	calcium-mediated signaling	2	10.5263	0.0922347	CD3E, TNF	19	103	19219	19.6413	1	0.477012	0.434155
BP	GO:0002250	adaptive immune response	2	10.5263	0.0956492	CD79B, CD3E	19	107	19219	18.907	1	0.489724	0.445725
CC	GO:0009897	external side of plasma membrane	11	57.8947	5.15094e-12	CD79B, IL6, CR2, PTPRC, CD40LG, SELL, CD19, CD27, CD3E, TNF, CD22	19	518	19739	22.0615	3.34814e-10	3.34811e-10	3.14207e-10
CC	GO:0009986	cell surface	7	36.8421	3.03339e-05	CR2, PTPRC, CD40LG, SELL, CD27, TNF, CD22	19	724	19739	10.0446	0.00196979	0.00098585	0.000925183
CC	GO:0030018	Z disc	4	21.0526	0.000263556	PDLIM3, ACTN2, LDB3, MYH7	19	140	19739	29.6827	0.0169874	0.00571038	0.00535897
CC	GO:0001725	stress fiber	3	15.7895	0.00274337	PDLIM3, LDB3, MYH7	19	86	19739	36.2405	0.163529	0.0445797	0.0418364
CC	GO:0035976	transcription factor AP-1 complex	2	10.5263	0.00455165	JUN, FOS	19	5	19739	415.558	0.256609	0.0591715	0.0555302
CC	GO:0005887	integral component of plasma membrane	5	26.3158	0.0116065	PTPRC, SELL, CD19, TNF, CD22	19	1007	19739	5.15837	0.531788	0.125737	0.117999
CC	GO:0005886	plasma membrane	10	52.6316	0.0296688	CD79B, JUN, PTPRC, CD40LG, SELL, ACTN2, CD19, CD3E, TNF, CD22	19	5279	19739	1.96798	0.858812	0.262747	0.246578
CC	GO:0031941	filamentous actin	2	10.5263	0.0323381	PDLIM3, LDB3	19	36	19739	57.7164	0.881958	0.262747	0.246578
CC	GO:0030017	sarcomere	2	10.5263	0.0420205	ACTN2, MYH7	19	47	19739	44.2083	0.938602	0.303482	0.284806
CC	GO:0005615	extracellular space	5	26.3158	0.0557844	IL6, CR2, CD40LG, SELL, TNF	19	1631	19739	3.18484	0.976032	0.362599	0.340285
MF	GO:0008092	cytoskeletal protein binding	3	15.7895	0.00194639	PDLIM3, ACTN2, LDB3	18	69	17769	42.9203	0.145989	0.157657	0.155711
MF	GO:0042802	identical protein binding	7	36.8421	0.00636056	CD79B, JUN, ACTN2, FOS, CD3E, TNF, MYH7	18	1893	17769	3.65038	0.403604	0.178815	0.176608
MF	GO:0004888	transmembrane signaling receptor activity	3	15.7895	0.00662279	CD79B, CD27, CD3E	18	129	17769	22.9574	0.41622	0.178815	0.176608
MF	GO:0005125	cytokine activity	3	15.7895	0.0124264	IL6, CD40LG, TNF	18	179	17769	16.5447	0.636814	0.19252	0.190143
MF	GO:0051371	muscle alpha-actinin binding	2	10.5263	0.0142607	PDLIM3, LDB3	18	15	17769	131.622	0.687588	0.19252	0.190143
MF	GO:0033691	sialic acid binding	2	10.5263	0.0142607	SELL, CD22	18	15	17769	131.622	0.687588	0.19252	0.190143
MF	GO:0051015	actin filament binding	3	15.7895	0.0199637	ACTN2, MYOM2, MYH7	18	230	17769	12.8761	0.804739	0.229163	0.226334
MF	GO:0070412	R-SMAD binding	2	10.5263	0.0236613	JUN, FOS	18	25	17769	78.9733	0.856239	0.229163	0.226334
MF	GO:0000976	transcription regulatory region sequence-specific DNA binding	3	15.7895	0.0256404	JUN, FOS, TNF	18	263	17769	11.2605	0.878028	0.229163	0.226334
MF	GO:0003779	actin binding	3	15.7895	0.0307198	PDLIM3, TNNI2, LDB3	18	290	17769	10.2121	0.920127	0.229163	0.226334
MF	GO:0005164	tumor necrosis factor receptor binding	2	10.5263	0.0311209	CD40LG, TNF	18	33	17769	59.8283	0.922761	0.229163	0.226334
