# Supplementary material for: Whole Transcriptome Sequencing and ceRNA Regulatory Network in Diabetic Peripheral Neuropathy
Source: Research Square preprint supplement (doi:10.21203/rs.3.rs-5673628/v1), 2025-01-09
Supplement: Supplementary file 2 [file 67bae61c32f6eb68aaf3e4d1.xlsx]

## Sheet: Sheet1
Category	Term	Count	%	PValue	Genes	List Total	Pop Hits	Pop Total	Fold Enrichment	Bonferroni	Benjamini	FDR
KEGG_PATHWAY	rno04662:B cell receptor signaling pathway	6	31.5789	7.66931e-08	CD79B, JUN, CR2, CD19, FOS, CD22	15	77	8978	46.639	9.12644e-06	9.12648e-06	6.6723e-06
KEGG_PATHWAY	rno04640:Hematopoietic cell lineage	6	31.5789	1.68741e-07	IL6, CR2, CD19, CD3E, TNF, CD22	15	90	8978	39.9022	2.008e-05	1.00401e-05	7.34025e-06
KEGG_PATHWAY	rno04660:T cell receptor signaling pathway	6	31.5789	3.4895e-07	JUN, PTPRC, CD40LG, FOS, CD3E, TNF	15	104	8978	34.5308	4.15242e-05	1.38417e-05	1.01196e-05
KEGG_PATHWAY	rno05142:Chagas disease	5	26.3158	1.55582e-05	IL6, JUN, FOS, CD3E, TNF	15	104	8978	28.7756	0.00184972	0.000382766	0.000279837
KEGG_PATHWAY	rno05169:Epstein-Barr virus infection	6	31.5789	1.60826e-05	IL6, JUN, CR2, CD19, CD3E, TNF	15	226	8978	15.8903	0.00191201	0.000382766	0.000279837
KEGG_PATHWAY	rno05340:Primary immunodeficiency	4	21.0526	2.09108e-05	PTPRC, CD40LG, CD19, CD3E	15	36	8978	66.5037	0.00248532	0.000414731	0.000303207
KEGG_PATHWAY	rno05133:Pertussis	4	21.0526	0.000176051	IL6, JUN, FOS, TNF	15	73	8978	32.7963	0.0207339	0.00299286	0.00218806
KEGG_PATHWAY	rno05417:Lipid and atherosclerosis	5	26.3158	0.000237795	IL6, JUN, CD40LG, FOS, TNF	15	209	8978	14.319	0.0279043	0.00353721	0.00258602
KEGG_PATHWAY	rno05323:Rheumatoid arthritis	4	21.0526	0.000286232	IL6, JUN, FOS, TNF	15	86	8978	27.8388	0.0334927	0.00378462	0.00276691
KEGG_PATHWAY	rno04657:IL-17 signaling pathway	4	21.0526	0.000349294	IL6, JUN, FOS, TNF	15	92	8978	26.0232	0.0407209	0.00390108	0.00285205
KEGG_PATHWAY	rno04620:Toll-like receptor signaling pathway	4	21.0526	0.000360604	IL6, JUN, FOS, TNF	15	93	8978	25.7434	0.0420116	0.00390108	0.00285205
KEGG_PATHWAY	rno05166:Human T-cell leukemia virus 1 infection	5	26.3158	0.000464254	IL6, JUN, FOS, CD3E, TNF	15	249	8978	12.0187	0.05376	0.00425798	0.00311298
KEGG_PATHWAY	rno05132:Salmonella infection	5	26.3158	0.000500654	IL6, JUN, PTPRC, FOS, TNF	15	254	8978	11.7822	0.0578519	0.00425798	0.00311298
KEGG_PATHWAY	rno04659:Th17 cell differentiation	4	21.0526	0.000500939	IL6, JUN, FOS, CD3E	15	104	8978	23.0205	0.0578838	0.00425798	0.00311298
KEGG_PATHWAY	rno04668:TNF signaling pathway	4	21.0526	0.000606252	IL6, JUN, FOS, TNF	15	111	8978	21.5688	0.0696234	0.0048096	0.00351626
KEGG_PATHWAY	rno05135:Yersinia infection	4	21.0526	0.00107198	IL6, JUN, FOS, TNF	15	135	8978	17.7343	0.119824	0.00797283	0.00582887
KEGG_PATHWAY	rno05162:Measles	4	21.0526	0.00129204	IL6, JUN, FOS, CD3E	15	144	8978	16.6259	0.142601	0.00904425	0.00661218
KEGG_PATHWAY	rno05161:Hepatitis B	4	21.0526	0.00165742	IL6, JUN, FOS, TNF	15	157	8978	15.2493	0.179135	0.0109574	0.00801085
KEGG_PATHWAY	rno04932:Non-alcoholic fatty liver disease	4	21.0526	0.00178162	IL6, JUN, FOS, TNF	15	161	8978	14.8704	0.191198	0.0111586	0.00815794
KEGG_PATHWAY	rno04514:Cell adhesion molecules	4	21.0526	0.0024513	PTPRC, CD40LG, SELL, CD22	15	180	8978	13.3007	0.253278	0.0145852	0.0106631
KEGG_PATHWAY	rno05144:Malaria	3	15.7895	0.00319874	IL6, CD40LG, TNF	15	55	8978	32.6473	0.317	0.0181262	0.0132519
KEGG_PATHWAY	rno05321:Inflammatory bowel disease	3	15.7895	0.00392088	IL6, JUN, TNF	15	61	8978	29.4361	0.373434	0.0212084	0.0155053
KEGG_PATHWAY	rno05170:Human immunodeficiency virus 1 infection	4	21.0526	0.00514318	JUN, FOS, CD3E, TNF	15	234	8978	10.2313	0.458611	0.0261655	0.0191294
KEGG_PATHWAY	rno05140:Leishmaniasis	3	15.7895	0.00527708	JUN, FOS, TNF	15	71	8978	25.2901	0.467214	0.0261655	0.0191294
KEGG_PATHWAY	rno04060:Cytokine-cytokine receptor interaction	4	21.0526	0.00757715	IL6, CD40LG, CD27, TNF	15	269	8978	8.90012	0.595504	0.0360672	0.0263685
KEGG_PATHWAY	rno05235:PD-L1 expression and PD-1 checkpoint pathway in cancer	3	15.7895	0.00818381	JUN, FOS, CD3E	15	89	8978	20.1753	0.623893	0.0360694	0.0263701
KEGG_PATHWAY	rno04658:Th1 and Th2 cell differentiation	3	15.7895	0.00818381	JUN, FOS, CD3E	15	89	8978	20.1753	0.623893	0.0360694	0.0263701
KEGG_PATHWAY	rno05410:Hypertrophic cardiomyopathy	3	15.7895	0.00854268	IL6, TNF, MYH7	15	91	8978	19.7319	0.639746	0.0363064	0.0265433
KEGG_PATHWAY	rno04933:AGE-RAGE signaling pathway in diabetic complications	3	15.7895	0.0104417	IL6, JUN, TNF	15	101	8978	17.7782	0.713235	0.0428469	0.031325
KEGG_PATHWAY	rno05171:Coronavirus disease - COVID-19	4	21.0526	0.0118812	IL6, JUN, FOS, TNF	15	317	8978	7.55247	0.758847	0.0471286	0.0344554
KEGG_PATHWAY	rno04625:C-type lectin receptor signaling pathway	3	15.7895	0.0129453	IL6, JUN, TNF	15	113	8978	15.8903	0.787869	0.0496934	0.0363305
KEGG_PATHWAY	rno04380:Osteoclast differentiation	3	15.7895	0.0147468	JUN, FOS, TNF	15	121	8978	14.8397	0.829314	0.0548395	0.0400927
KEGG_PATHWAY	rno04210:Apoptosis	3	15.7895	0.0184	JUN, FOS, TNF	15	136	8978	13.2029	0.890298	0.0663513	0.048509
KEGG_PATHWAY	rno05418:Fluid shear stress and atherosclerosis	3	15.7895	0.022399	JUN, FOS, TNF	15	151	8978	11.8914	0.932511	0.0783966	0.0573152
KEGG_PATHWAY	rno04621:NOD-like receptor signaling pathway	3	15.7895	0.0304196	IL6, JUN, TNF	15	178	8978	10.0876	0.974679	0.103427	0.0756144
KEGG_PATHWAY	rno05310:Asthma	2	10.5263	0.0398174	CD40LG, TNF	15	26	8978	46.041	0.992055	0.131619	0.0962255
KEGG_PATHWAY	rno05167:Kaposi sarcoma-associated herpesvirus infection	3	15.7895	0.0433542	IL6, JUN, FOS	15	216	8978	8.31296	0.994879	0.138778	0.10146
KEGG_PATHWAY	rno01523:Antifolate resistance	2	10.5263	0.0443158	IL6, TNF	15	29	8978	41.2782	0.995456	0.138778	0.10146
KEGG_PATHWAY	rno05143:African trypanosomiasis	2	10.5263	0.0606428	IL6, TNF	15	40	8978	29.9267	0.999415	0.185038	0.13528
KEGG_PATHWAY	rno04672:Intestinal immune network for IgA production	2	10.5263	0.0650505	IL6, CD40LG	15	43	8978	27.8388	0.999666	0.193525	0.141485
KEGG_PATHWAY	rno04010:MAPK signaling pathway	3	15.7895	0.0750606	JUN, FOS, TNF	15	294	8978	6.10748	0.999907	0.217859	0.159275
KEGG_PATHWAY	rno05134:Legionellosis	2	10.5263	0.0868021	IL6, TNF	15	58	8978	20.6391	0.99998	0.245939	0.179804
KEGG_PATHWAY	rno05332:Graft-versus-host disease	2	10.5263	0.0910957	IL6, TNF	15	61	8978	19.624	0.999988	0.250232	0.182943
KEGG_PATHWAY	rno05330:Allograft rejection	2	10.5263	0.0925227	CD40LG, TNF	15	62	8978	19.3075	0.99999	0.250232	0.182943
